# Supplementary material for: Separating underwater ambient noise from flow noise recorded on stereo acoustic tags attached to marine mammals
Source: Oxford University Press journal article supplement (doi:10.1242/jeb.133116), 2016-01-01
Supplement: jeb133116supp.pdf [file jeb133116supp.pdf]

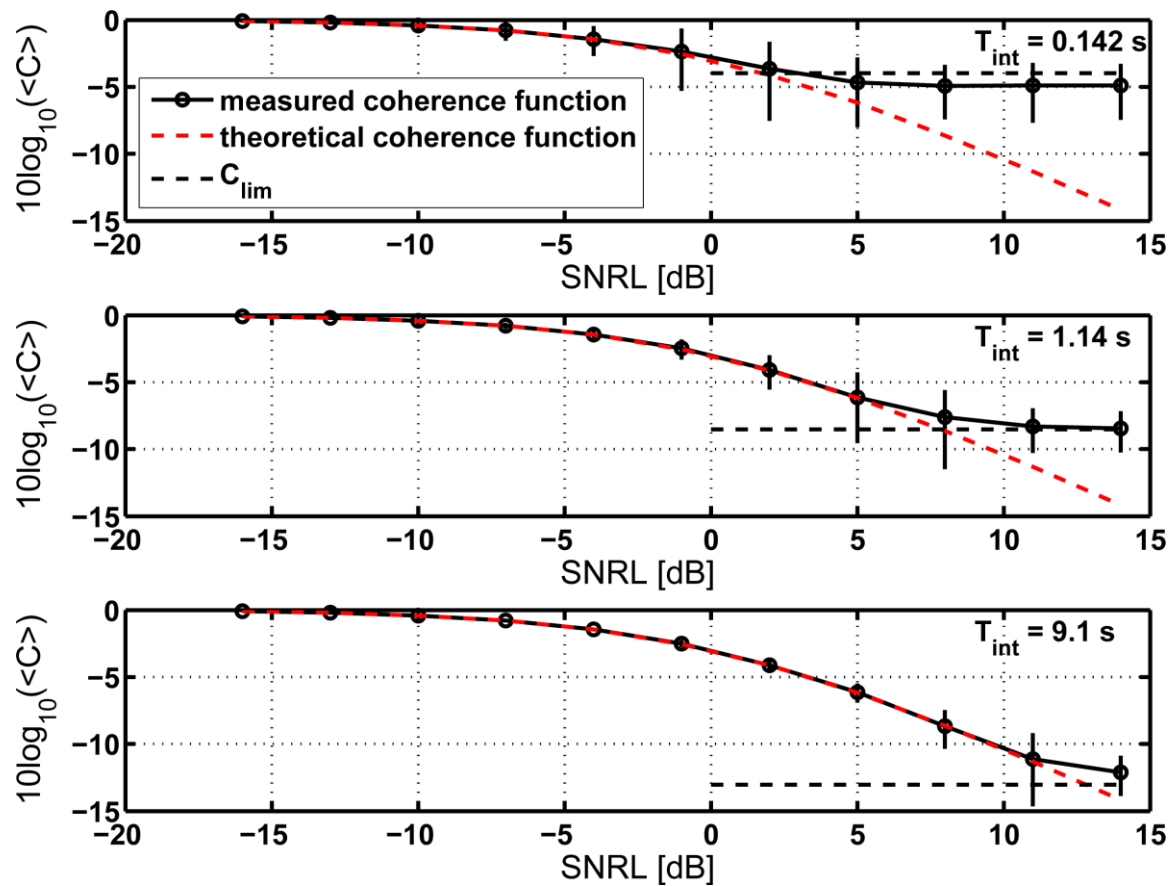

**Fig. S1. Accuracy of the measured mean coherence function for an integration time of 0.14 s (top), 1.14 s (middle), and 9.1 s (bottom) for random Gaussian noise.** The accuracy of the measured mean coherence function  $\langle C \rangle$ , averaged over all frequencies, as a function of  $\text{SNRL} = \text{SPL}_{\text{ncorr}} - \text{SPL}_{\text{corr}}$ , with the correct coherence coefficient superimposed in red. Artificial time series were generated by mixing a coherent and incoherent time series. Error-bars indicate the 3-sigma uncertainties on the measured mean coherence function. The black dashed line shows the empirically determined limit  $C_{\text{lim}} = \frac{3}{\sqrt{N_{\text{samp}}/2}}$  for measuring the coherence function when the flow noise dominates, with  $N_{\text{samp}} = \frac{w}{df} = w \cdot T_{\text{int}}$  and  $df$  the frequency resolution. The shortest integration time (0.14 s, top panel) indicated that in order

to ensure that the measurement was dominated by the correlated noise ( $\text{SNRL} \leq -3$  dB), the measured level of the correlation coefficient  $10 \log_{10} \langle C \rangle$  needed to be at least -6 dB or higher. This criterion was adopted to obtain reliable measurements of the ambient noise. For the longest integration time (9.1 s, bottom panel), the correlation coefficient could be measured reliably even when the uncorrelated noise exceeded the correlated noise by 10 dB.

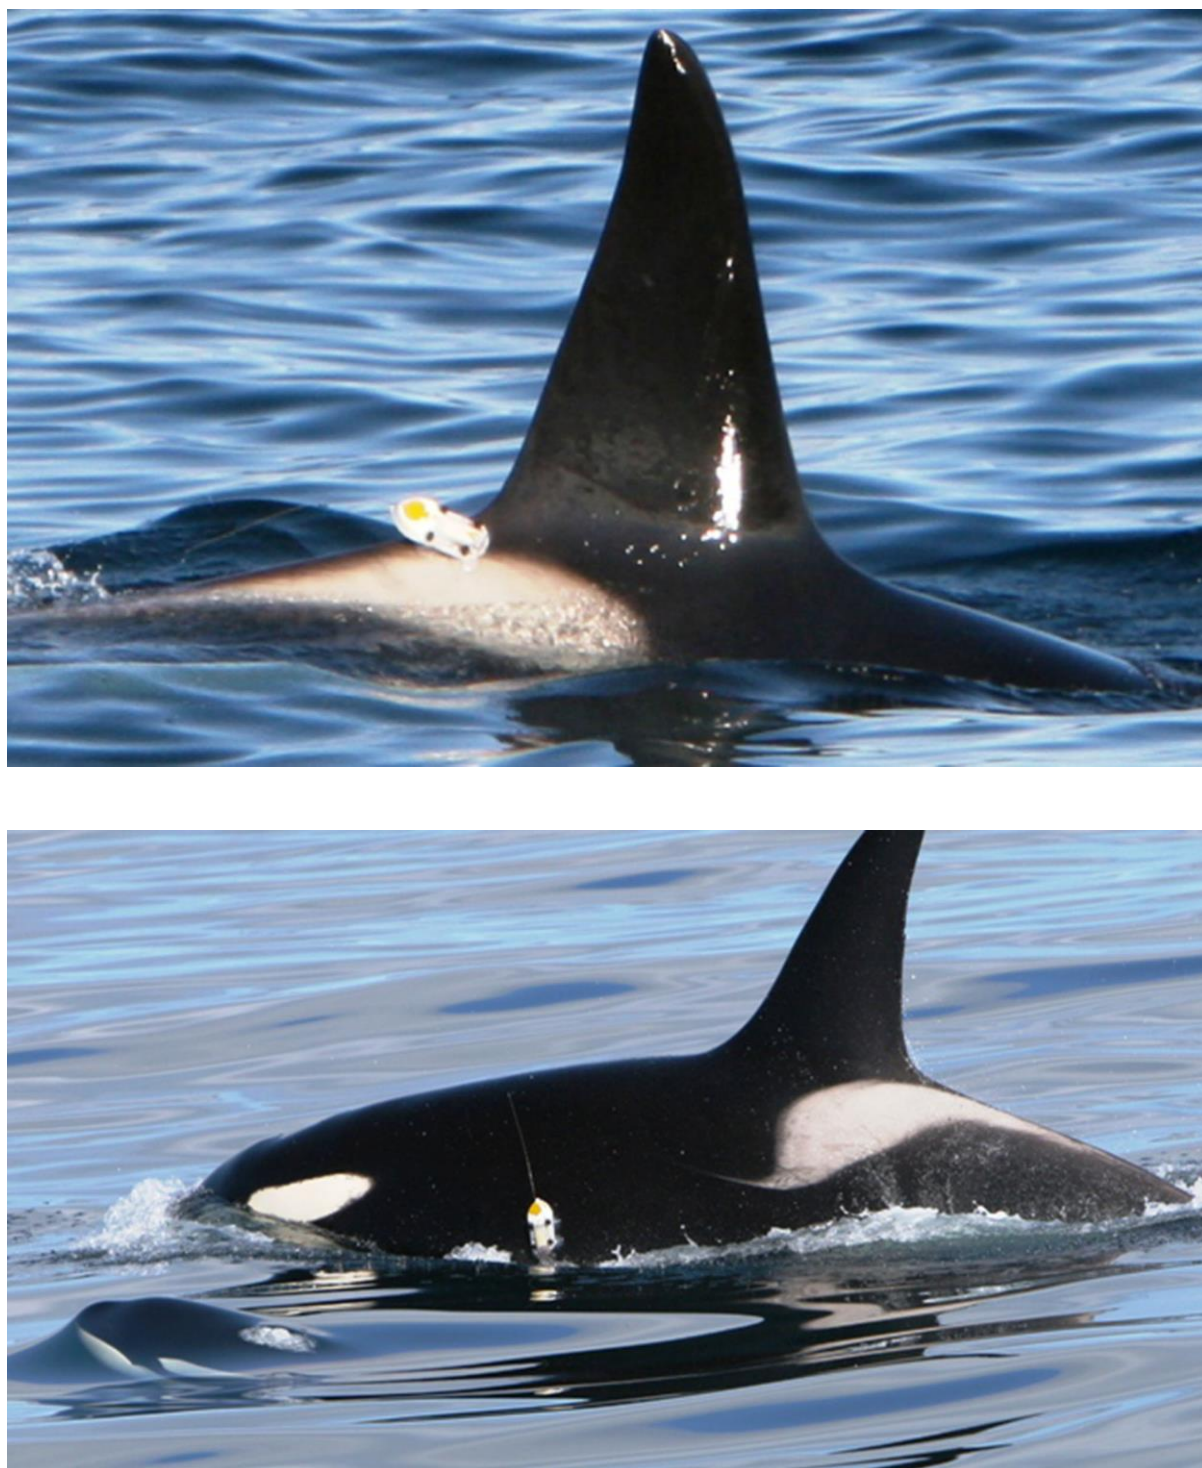

**Fig. S2. Tag placement location on two killer whales.** The top picture shows the tag placement of oo09\_144a, and the bottom picture that of oo09\_144b. Tag oo09\_144b was situated on the left flank of the killer whale, whereas tag oo09\_144a was placed just posterior

of the dorsal fin of the animal. Tag oo09\_144a was positioned on the right side of the body near the dorsal fin and slid backwards slightly during the deployment. The tag on the other animal slid much further down, to the lower left side of the body, soon after it was deployed. Before the start of the first sonar exposure, the tagged animals were making deep dives, with underwater tail slap sounds indicative of feeding recorded on the tags.

**Table S1. Stereo acoustic version-2 DTAG deployments on two whale species.** The table lists the tags used in the flow and ambient noise analysis, with Tag ID, species, estimated age/sex of the animals, dates, duration and general area of the tag deployments.

| Tag ID    | Species                                             | Age/Sex      | Date                          | Deployment duration | Location                                         |
|-----------|-----------------------------------------------------|--------------|-------------------------------|---------------------|--------------------------------------------------|
| mn12_180a | Humpback whale<br>( <i>Megaptera novaeangliae</i> ) | adult female | June 2012,<br>at 18:03<br>UTC | 15 hours            | Near Bear Island                                 |
| oo09_144a | Killer whale<br>( <i>Orcinus orca</i> )             | adult male   | May 2009<br>at 09:58<br>UTC   | 12 hours            | Norwegian continental shelf<br>(Vesteralen area) |
| oo09_144b | Killer whale<br>( <i>Orcinus orca</i> )             | adult male   | May 2009<br>at 10:52<br>UTC   | 12 hours            | Norwegian continental shelf<br>(Vesteralen area) |

**Table S2. Measured contribution of correlated and uncorrelated noise on total noise**

**budget.** Listed are the total sound pressure levels (SPL) measured in different depth ranges for different frequencies measured on two tagged killer whales (oo99\_144a, oo09\_144b) during a 30 min period. The table shows the mean ( $\pm 1$  SD) of the  $SPL_{tot}$  for all data points, and mean ( $\pm 1$  SD) for times when the correlated part dominated the sound field ( $SPL_{corr}$ ) and for when the uncorrelated dominated the correlated contribution ( $SPL_{uncorr}$ ). The fractions of time of which the correlated or uncorrelated noise dominated the noise level are indicated in separate columns. The  $SPL_{corr}$  (indicated in bold) was considered to provide a reliable estimate of the ambient noise during the 30 min period.

| Frequency        | Depth range [m] | total<br>< $SPL_{tot}$ ><br>dB re 1 $\mu Pa^2$<br>( $\pm 1$ SD) | correlated<br>< $SPL_{corr}$ ><br>dB re 1 $\mu Pa^2$<br>( $\pm 1$ SD) | Fraction of time correlated noise dominant | uncorrelated<br>< $SPL_{uncorr}$ ><br>dB re 1 $\mu Pa^2$ | Fraction of time uncorrelated noise dominant |
|------------------|-----------------|-----------------------------------------------------------------|-----------------------------------------------------------------------|--------------------------------------------|----------------------------------------------------------|----------------------------------------------|
| <b>Oo09_144a</b> |                 |                                                                 |                                                                       |                                            |                                                          |                                              |
| 1 kHz (1/3 Oct)  | 2 – 20          | 100.2 ( $\pm 6.4$ )                                             | <b>96.8 (<math>\pm 2.5</math>)</b>                                    | 0.31                                       | 106.8 ( $\pm 6.9$ )                                      | 0.07                                         |
|                  | 20 – 400        | 110.6 ( $\pm 8.1$ )                                             | <b>100.8 (<math>\pm 2.6</math>)</b>                                   | 0.24                                       | 113.7 ( $\pm 6.0$ )                                      | 0.63                                         |
| 2 kHz (1/3 Oct)  | 2 – 20          | 94.1 ( $\pm 6.2$ )                                              | <b>92.8 (<math>\pm 5.1</math>)</b>                                    | 0.44                                       | n/a                                                      | 0                                            |
|                  | 20 – 400        | 104.0 ( $\pm 7.0$ )                                             | <b>99.7 (<math>\pm 4.9</math>)</b>                                    | 0.61                                       | 109.3 ( $\pm 1.1$ )                                      | 0.0005                                       |

|                  |          |                      |                                     |      |                     |      |
|------------------|----------|----------------------|-------------------------------------|------|---------------------|------|
| <b>Oo09_144b</b> |          |                      |                                     |      |                     |      |
| 1 kHz (1/3 Oct)  | 2 – 20   | 97.5 ( $\pm 10.9$ )  | <b>88.7 (<math>\pm 3.5</math>)</b>  | 0.13 | 105.2 ( $\pm 8.9$ ) | 0.17 |
|                  | 20 – 400 | 116.8 ( $\pm 10.3$ ) | <b>100.4 (<math>\pm 3.2</math>)</b> | 0.14 | 119 ( $\pm 7.6$ )   | 0.79 |
| 2 kHz (1/3 Oct)  | 2 – 20   | 92.0 ( $\pm 6.7$ )   | <b>89.0 (<math>\pm 3.7</math>)</b>  | 0.20 | 98.0 ( $\pm 7.2$ )  | 0.06 |
|                  | 20 – 400 | 107.8 ( $\pm 9.2$ )  | <b>98.0 (<math>\pm 5.2</math>)</b>  | 0.25 | 110.6 ( $\pm 7.1$ ) | 0.45 |
